# Supplementary material
Source: PubMed Central journal article supplement (PMC3889014)
Supplement: NIHMS538480-supplement-1_si_001.pdf [file NIHMS538480-supplement-1_si_001.pdf]

## SUPPORTING INFORMATION

Cho, Sung-Hee, and Guengerich, F. Peter (2013) *Chem. Res. Toxicol.* 26, xxx-xxx

Department of Biochemistry and Center in Molecular Toxicology, Vanderbilt University School of Medicine, Nashville, Tennessee 37232-0146

*In Vivo* Roles of Conjugation with Glutathione and *O*<sup>6</sup>-Alkylguanine DNA-Alkyltransferase in the Mutagenicity of the *bis*-Electrophiles 1,2-Dibromoethane and 1,2,3,4-Diepoxybutane in Mice

### TABLE OF CONTENTS

**Figure S1.** GSH levels (A) and AGT activities (B) in livers of B6C3F1 male mice 6 h after treatment with vehicle, 1,2-dibromoethane (DBE, 30 mg/kg, ip), *O*<sup>6</sup>-BzGua (80 mg/kg, ip), or BSO (8 mg/kg, ip).

**Figure S2.** GSH levels in livers of Big Blue® transgenic mice 6 and 24 h after treatment with (A) vehicle, 1,2-dibromoethane (DBE), *O*<sup>6</sup>-BzGua/DBE, or BSO/DBE and (B) vehicle, DEB, *O*<sup>6</sup>-BzGua/DEB, or BSO/DEB.

**Figure S3.** Gel electrophoresis imaging measurements of AGT activity in livers of Big Blue® mice treated with vehicle, DBE, BSO, or *O*<sup>6</sup>-BzGua.

**Figure S4.** AGT activities in liver of Big Blue® transgenic mice at 6 and 24 h after treatment with (A) vehicle, DBE, *O*<sup>6</sup>-BzGua/DBE, or BSO/DBE and (B) vehicle, DEB, *O*<sup>6</sup>-BzGua/DEB, or BSO/DEB.

**Table S1.** Quantitative Analysis of DNA Adducts in Livers of Big Blue® Transgenic Mice 6 and 24 h after Treatment with Vehicle, Dibromoethane, *O*<sup>6</sup>-BzGua/ Dibromoethane, or BSO/ Dibromoethane

**Table S2.** Quantitative Analysis of DNA Adducts in Livers of Big Blue® Transgenic Mice 6 and 24 h after Treatment with Vehicle, DEB, *O*<sup>6</sup>-BzGua/DEB, or BSO/DEB

**Table S3.** Independent Mutations in the Liver *cII* Gene of Big Blue® Transgenic Mice Treated with Vehicle, Dibromoethane, BSO/ Dibromoethane, or *O*<sup>6</sup>-BzGua/Dibromoethane

**Table S4.** Independent Mutations in the Liver *cII* Gene of Big Blue® Transgenic Mice Treated with Vehicle, DEB, BSO/DEB, or *O*<sup>6</sup>-BzGua/DEB

**Figure S1.** GSH levels (A) and AGT activities (B) in livers of B6C3F1 male mice 6 h after treatment with vehicle, 1,2-dibromoethane (DBE, 30 mg/kg, ip), *O*<sup>6</sup>-BzGua (80 mg/kg, ip), or BSO (8 mg/kg, ip). n = 5

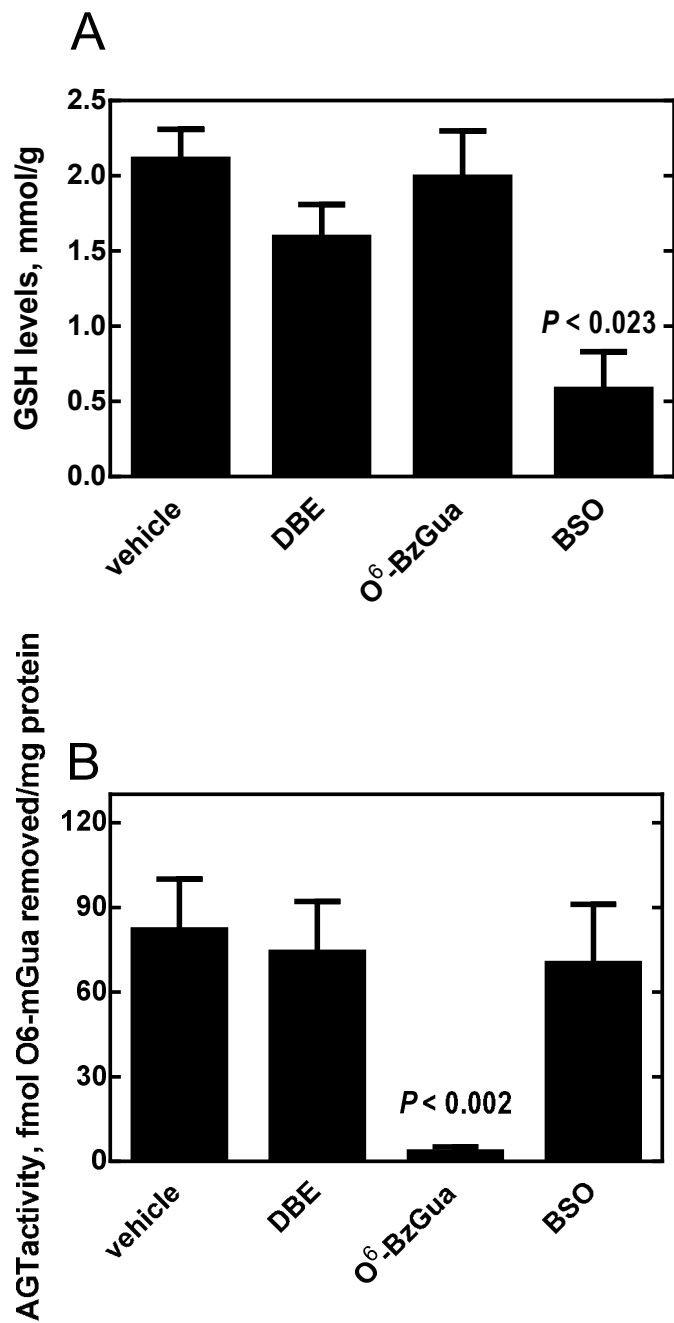

**Figure S2.** GSH levels in liver of Big Blue® transgenic mice 6 and 24 h after treatment with (A) vehicle, 1,2-dibromoethane (DBE), *O*<sup>6</sup>-BzGua/DBE, or BSO/DBE and (B) vehicle, DEB, *O*<sup>6</sup>-BzGua/DEB, or BSO/DEB. *O*<sup>6</sup>-BzGua (80 mg/kg, ip) was administered 1 h prior to treatment with DBE (30 mg/kg, ip) or DEB (25 mg/kg, ip), and BSO (8 mg/kg, ip) was administered 2 h prior to treatment with DBE (30 mg/kg, ip) or DEB (25 mg/kg, ip).

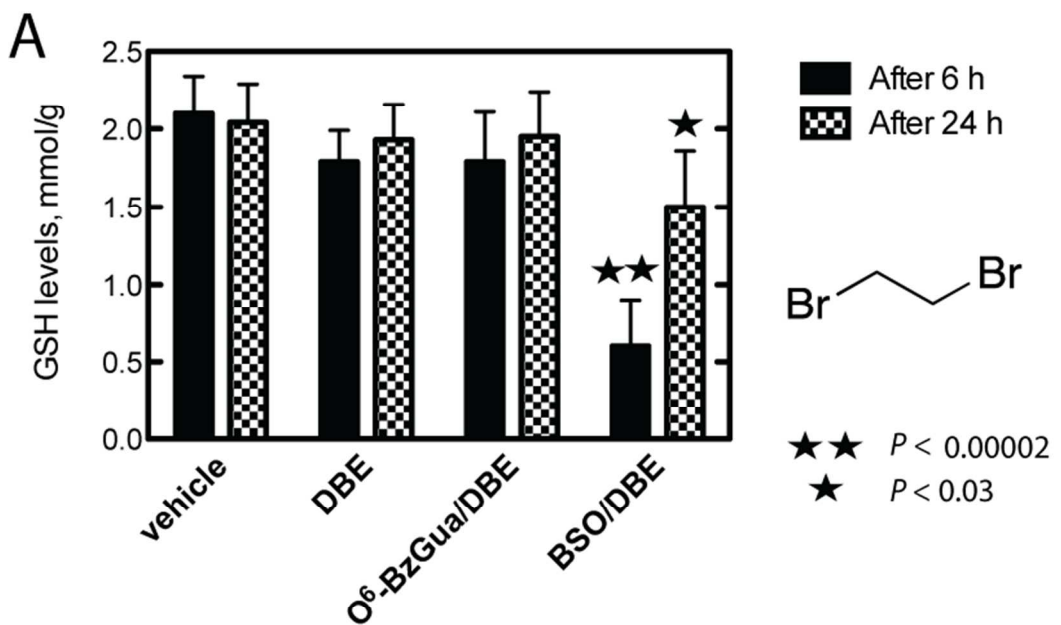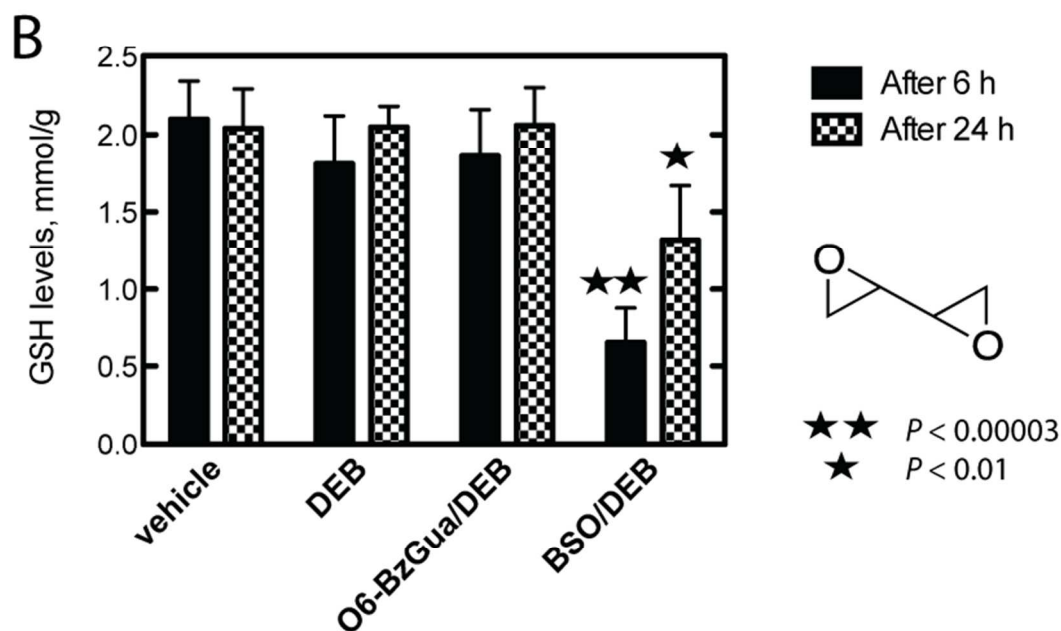

**Figure S3.** Gel electrophoresis imaging measurements of AGT activity in liver extracts of Big Blue® mice treated with vehicle, dibromoethane (DBE), BSO, or *O*<sup>6</sup>-BzGua. The substrate (*upper bands*) and product (*lower bands*) were separated by denaturing gel electrophoresis after uracil DNA glycosylase/piperidine hydrolysis (3'-CGGAGCTCGGTTCGGCGTCTGCGUCXCTCCTGCGGCT-<sup>32</sup>P 5' (X: *O*<sup>6</sup>-MeGua)/5'-GCCTCGAGCCAGCCGCAGACGCAGCGAGGA-3').

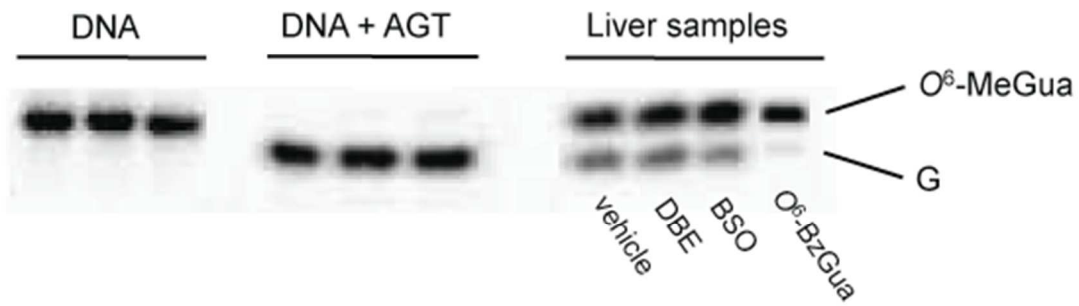

**Figure S4.** AGT activities in liver of Big Blue® transgenic mice at 6 and 24 h after treatment with (A) vehicle, DBE, *O*<sup>6</sup>-BzGua/DBE, or BSO/DBE and (B) vehicle, DEB, *O*<sup>6</sup>-BzGua/DEB, or BSO/DEB. *O*<sup>6</sup>-BzGua (80 mg/kg, ip) was administered 1 h prior to treatment with DBE (30 mg/kg, ip) or DEB (25 mg/kg, ip), and BSO (8 mg/kg, ip) was administered 2 h prior to treatment with DBE (30 mg/kg, ip) or DEB (25 mg/kg, ip).

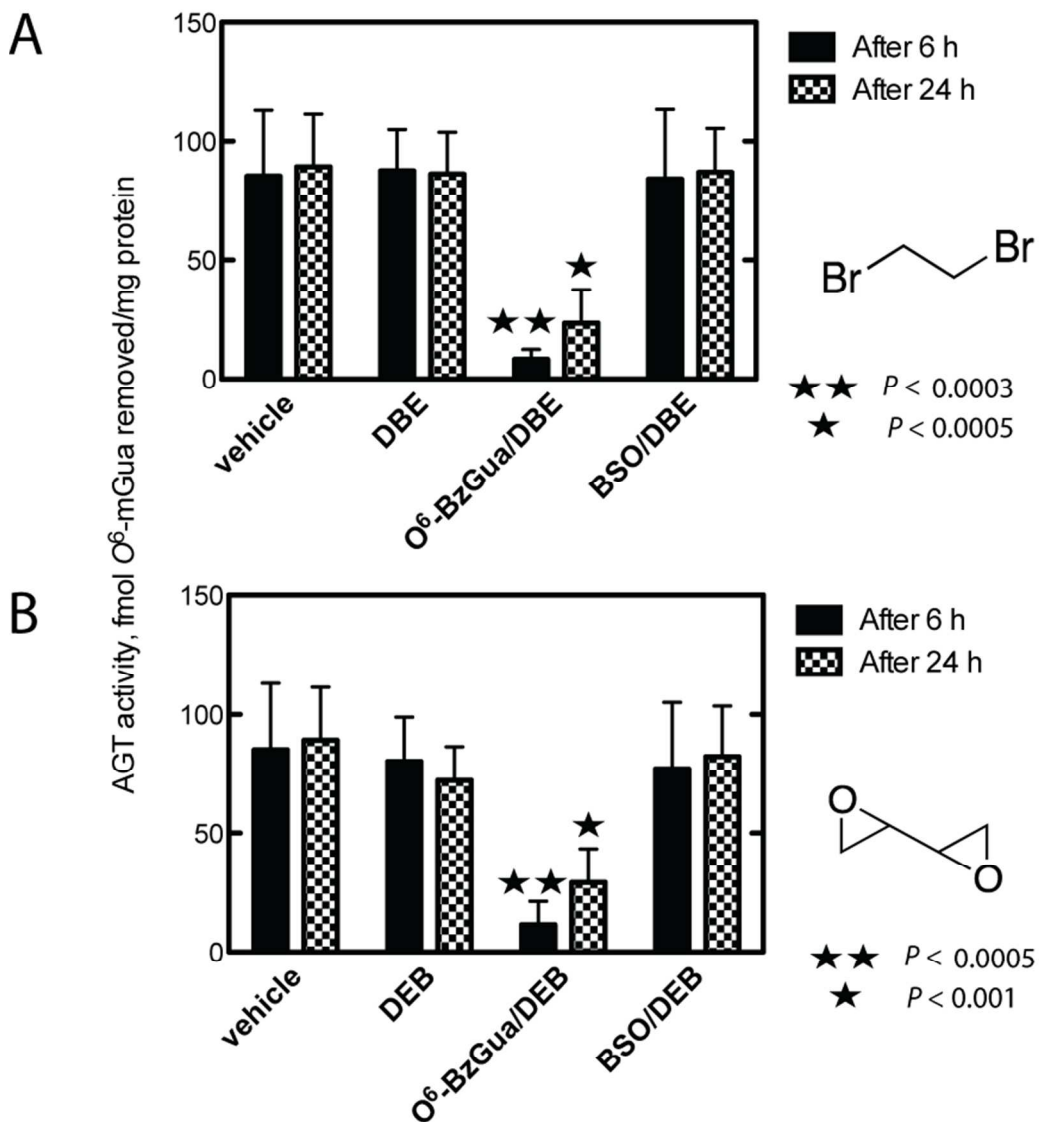

**Table S1.** Quantitative Analysis of DNA Adducts in Livers of Big Blue® Transgenic Mice 6 and 24 h after Treatment with Vehicle, Dibromoethane (, *O*<sup>6</sup>-BzGua/ Dibromoethane, or BSO/ Dibromoethane

| time       | adducts<br>per 10 <sup>5</sup> bases | control <sup>a</sup><br>( <i>n</i> = 5) | dibromoethane<br>( <i>n</i> = 5) | BSO/<br>dibromoethane<br>( <i>n</i> = 5) | <i>O</i> <sup>6</sup> BzGua/<br>dibromoethane<br>( <i>n</i> = 5) |
|------------|--------------------------------------|-----------------------------------------|----------------------------------|------------------------------------------|------------------------------------------------------------------|
| after 6 h  | <i>N</i> <sup>7</sup> G-ethyl-GSH    | ND <sup>b</sup>                         | 4.8 ± 0.8                        | 2.2 ± 0.3                                | 5.2 ± 0.8                                                        |
|            | <i>N</i> <sup>6</sup> dA-ethyl-GSH   | ND                                      | ND                               | ND                                       | ND                                                               |
|            | <i>N</i> <sup>1</sup> A-ethyl-GSH    | ND                                      | ND                               | ND                                       | ND                                                               |
| after 24 h | <i>N</i> <sup>7</sup> G-ethyl-GSH    | ND                                      | 3.5 ± 0.8                        | 1.8 ± 0.6                                | 3.4 ± 0.9                                                        |
|            | <i>N</i> <sup>6</sup> dA-ethyl-GSH   | ND                                      | ND                               | ND                                       | ND                                                               |
|            | <i>N</i> <sup>1</sup> A-ethyl-GSH    | ND                                      | ND                               | ND                                       | ND                                                               |

<sup>a</sup>Control: not treated with DBE.

<sup>b</sup>ND, not detected (limit of detection 5 adducts/10<sup>8</sup> bases)

**Table S2.** Quantitative Analysis of DNA Adducts in Livers of Big Blue® Transgenic Mice 6 and 24 h after Treatment with Vehicle, DEB, *O*<sup>6</sup>-BzGua/DEB, or BSO/DEB

| time       | adducts<br>per 10 <sup>7</sup> bases                 | control <sup>a</sup><br>( <i>n</i> = 5) | DEB<br>( <i>n</i> = 5) | BSO/DEB<br>( <i>n</i> = 5) | <i>O</i> <sup>6</sup> BzGua/DEB<br>( <i>n</i> = 5) |
|------------|------------------------------------------------------|-----------------------------------------|------------------------|----------------------------|----------------------------------------------------|
| after 6 h  | <i>N</i> <sup>7</sup> G-(OH) <sub>2</sub> butyl-GSH  | ND <sup>b</sup>                         | 0.24 ± 0.07            | 0.13 ± 0.03                | 0.22 ± 0.02                                        |
|            | <i>N</i> <sup>6</sup> dA-(OH) <sub>2</sub> butyl-GSH | ND                                      | 0.22 ± 0.06            | 0.12 ± 0.02                | 0.23 ± 0.04                                        |
|            | <i>N</i> <sup>3</sup> A-(OH) <sub>2</sub> butyl-GSH  | ND                                      | ND                     | ND                         | ND                                                 |
|            | <i>N</i> <sup>1</sup> dG-(OH) <sub>2</sub> butyl-GSH | ND                                      | ND                     | ND                         | ND                                                 |
|            | <i>N</i> <sup>3</sup> dT-(OH) <sub>2</sub> butyl-GSH | ND                                      | ND                     | ND                         | ND                                                 |
|            | <i>N</i> <sup>4</sup> dC-(OH) <sub>2</sub> butyl-GSH | ND                                      | ND                     | ND                         | ND                                                 |
| after 24 h | <i>N</i> <sup>7</sup> G-(OH) <sub>2</sub> butyl-GSH  | ND                                      | 0.19 ± 0.06            | 0.07 ± 0.02                | 0.17 ± 0.04                                        |
|            | <i>N</i> <sup>6</sup> dA-(OH) <sub>2</sub> butyl-GSH | ND                                      | 0.18 ± 0.03            | 0.08 ± 0.04                | 0.17 ± 0.04                                        |
|            | <i>N</i> <sup>3</sup> A-(OH) <sub>2</sub> butyl-GSH  | ND                                      | ND                     | ND                         | ND                                                 |
|            | <i>N</i> <sup>1</sup> dG-(OH) <sub>2</sub> butyl-GSH | ND                                      | ND                     | ND                         | ND                                                 |
|            | <i>N</i> <sup>3</sup> dT-(OH) <sub>2</sub> butyl-GSH | ND                                      | ND                     | ND                         | ND                                                 |
|            | <i>N</i> <sup>4</sup> dC-(OH) <sub>2</sub> butyl-GSH | ND                                      | ND                     | ND                         | ND                                                 |

<sup>a</sup>Control: not treated with DBE.

<sup>b</sup>ND, not detected (limit of detection 0.03 adducts/10<sup>7</sup> bases)

**Table S3.** Independent Mutations in the Liver *cII* Gene of Big Blue® Transgenic Mice Treated with Vehicle, Diibromoethane (DBE), BSO/ Diibromoethane, or *O*<sup>6</sup>-BzGua/ Dibromoethane

| position <sup>a</sup> | mutation <sup>b</sup> | amino acid change | sequence context<br>5' → 3' <sup>c</sup> | number of independent mutations |     |         |                                  |
|-----------------------|-----------------------|-------------------|------------------------------------------|---------------------------------|-----|---------|----------------------------------|
|                       |                       |                   |                                          | vehicle                         | DBE | BSO/DBE | <i>O</i> <sup>6</sup> -BzGua/DBE |
| 1                     | A → G                 | Met → Val         | catATGggt                                |                                 | 1   |         |                                  |
|                       | A → T                 | Met → Leu         | catATGggt                                |                                 |     | 1       |                                  |
| 2                     | T → A                 | Met → Lys         | catATGggt                                |                                 |     | 1       |                                  |
|                       | T → C                 | Met → Thr         | catATGggt                                |                                 | 1   |         |                                  |
| 3                     | G → A                 | Met → Ile         | catATGggt                                |                                 | 1   | 1       | 2                                |
|                       | G → C                 | Met → Ile         | catATGggt                                |                                 |     | 1       |                                  |
|                       | G → T                 | Met → Ile         | catATGggt                                |                                 | 1   | 1       | 1                                |
| 15                    | C → A                 | Asn → Lys         | gcaAACaaa                                | 1                               |     | 1       |                                  |
| 16                    | A → T                 | Lys → Stop        | aacAAAcgc                                |                                 |     | 1       |                                  |
| 19                    | C → T                 | Arg → Cys         | aaaCGCaac                                |                                 | 1   | 1       |                                  |
| 25                    | G → A                 | Glu → Lys         | aacGAGgct                                | 2                               | 1   | 1       | 1                                |
|                       | G → T                 | Glu → Stop        | aacGAGgct                                | 1                               | 1   |         |                                  |
| 26                    | A → G                 | Glu → Gly         | aacGAGgct                                |                                 |     | 1       |                                  |
| 31                    | C → A                 | Leu → Ile         | gctCTAcga                                |                                 | 1   |         | 1                                |
| 34                    | C → T                 | Arg → Stop        | ctaCGAatc                                | 3                               | 2   | 2       | 1                                |
| 35                    | G → A                 | Arg → Glu         | ctaCGAatc                                | 1                               | 1   | 1       |                                  |
|                       | G → T                 | Arg → Leu         | ctaCGAatc                                |                                 |     |         | 1                                |
| 39                    | C → G                 | Ile → Met         | cgaATCgag                                |                                 |     | 1       |                                  |
| 40                    | G → A                 | Glu → Lys         | atcGAGagt                                |                                 | 1   |         |                                  |
| 39-40                 | CG → AT               | Glu → Stop        | cgaATCGAGagt                             |                                 |     | 1       |                                  |
| 41                    | A → T                 | Glu → Val         | atcGAGagt                                |                                 | 1   |         |                                  |
|                       | A → G                 | Glu → Gly         | atcGAGagt                                |                                 |     |         | 1                                |
| 50                    | T → C                 | Leu → Ser         | gcgTTGctt                                |                                 | 1   |         |                                  |
| 51                    | G → T                 | Leu → Phe         | gcgTTGctt                                |                                 |     | 1       | 1                                |
| 55                    | A → C                 | Asn → His         | cttAACaaa                                |                                 | 1   |         | 1                                |
| 64                    | G → A                 | Ala → Thr         | atcGCAatg                                |                                 | 1   | 1       |                                  |
| 74                    | G → A                 | Gly → Glu         | cttGGAact                                |                                 | 1   | 1       | 1                                |
|                       | G → T                 | Gly → Val         | cttGGAact                                | 1                               |     | 1       |                                  |
| 89                    | C → A                 | Ala → Glu         | acaGCGgaa                                |                                 |     |         | 1                                |
|                       | C → T                 | Ala → Val         | acaGCGgaa                                | 1                               | 1   | 2       | 1                                |
| 101                   | G → T                 | Gly → Val         | gtgGGCggt                                |                                 | 1   |         |                                  |
| 103                   | G → A                 | Val → Ile         | ggcGTTgat                                | 3                               | 1   | 2       | 1                                |
|                       | G → C                 | Val → Leu         | ggcGTTgat                                | 1                               |     |         | 1                                |
|                       | G → T                 | Val → Phe         | ggcGTTgat                                | 1                               |     | 1       |                                  |
| 108                   | T → C                 | Asp → Asp         | gatGATaag                                |                                 |     |         | 1                                |
| 113                   | C → T                 | Ser → Leu         | aagTCGcag                                | 1                               | 1   | 1       |                                  |
| 115                   | C → A                 | Gln → Lys         | tcgCAGatc                                |                                 | 1   |         | 1                                |
|                       | C → T                 | Gln → Stop        | tcgCAGatc                                |                                 | 1   | 1       |                                  |
| 118                   | A → T                 | Ile → Phe         | cagATCagc                                | 1                               |     |         |                                  |
| 124                   | A → G                 | Arg → Gly         | agcAGGtgg                                |                                 |     |         | 1                                |

|         |         |            |                     |    |    |    |    |
|---------|---------|------------|---------------------|----|----|----|----|
| 125     | G → T   | Arg → Met  | agc <u>AG</u> Gtgg  |    |    |    | 1  |
| 141     | G → A   | Trp → Stop | gacT <u>GG</u> gatt |    | 1  | 1  | 1  |
|         | G → T   | Trp → Cys  | gacT <u>GG</u> gatt | 1  |    | 1  |    |
| 145     | C → A   | Pro → Thr  | att <u>CC</u> Aaag  |    | 1  |    | 1  |
| 160     | C → A   | Leu → Met  | atg <u>CT</u> Gctt  |    | 1  |    |    |
|         | C → G   | Leu → Val  | atg <u>CT</u> Gctt  |    |    |    | 1  |
| 164     | T → A   | Leu → His  | ctg <u>CT</u> Tgct  |    |    |    | 1  |
| 175     | G → T   | Glu → Stop | ctt <u>GA</u> Atgg  |    | 1  |    |    |
| 178/185 | +G      | Frameshift | <u>tGGGGGG</u> t    | 3  | 1  | 3  | 2  |
| 179     | G → A   | Trp → Stop | gaaT <u>GG</u> ggg  |    | 1  |    | 1  |
|         | G → T   | Trp → Leu  | gaaT <u>GG</u> ggg  |    | 1  |    | 1  |
| 179-184 | -G      | Frameshift | <u>tGGGGGG</u> t    | 1  | 1  | 1  | 1  |
| 182     | G → T   | Gly → Val  | tgg <u>GG</u> Ggtc  |    | 1  |    |    |
| 185     | T → G   | Val → Gly  | gggT <u>TC</u> gtt  | 1  | 1  | 1  | 1  |
| 190     | G → C   | Asp → Gln  | ggt <u>GAC</u> gac  | 1  |    |    |    |
| 193     | G → T   | Asp → Tyr  | gac <u>GAC</u> gac  |    | 1  |    | 1  |
| 196     | G → A   | Asp → Asn  | gac <u>GAC</u> atg  | 4  | 1  | 3  | 1  |
|         | G → T   | Asp → Tyr  | gac <u>GAC</u> atg  |    | 1  |    |    |
| 200     | T → A   | Met → Lys  | gacA <u>TG</u> gct  |    |    |    | 1  |
| 206     | G → T   | Arg → Leu  | gct <u>CG</u> Attg  |    |    |    | 1  |
|         | G → A   | Arg → Gln  | gct <u>CG</u> Attg  | 2  | 1  | 2  | 1  |
| 211     | G → C   | Ala → Pro  | ttg <u>GCG</u> cga  | 1  |    |    |    |
|         | G → A   | Ala → Thr  | ttg <u>GCG</u> cga  |    |    | 1  |    |
| 212     | C → T   | Ala → Val  | ttg <u>GCG</u> cga  | 2  | 1  | 1  | 1  |
| 214     | C → T   | Arg → Stop | gcg <u>CGA</u> caa  | 2  | 1  | 1  | 1  |
| 220     | G → T   | Val → Phe  | caa <u>GTT</u> gct  | 1  |    | 1  |    |
| 224-225 | GT → TG | Ala → Val  | gttG <u>CT</u> gcg  |    |    |    | 1  |
| 274     | C → A   | Gln → Lys  | gaa <u>CAA</u> atc  |    | 1  |    | 1  |
| 287     | A → T   | Glu → Val  | atgG <u>AG</u> ttc  | 1  |    |    |    |
| Total   |         |            |                     | 37 | 40 | 42 | 38 |

<sup>a</sup>Position 1 is the first base of the start codon in the *cII* coding sequence.

<sup>b</sup>Presented in term of sequence change on nontranscribed DNA strand.

<sup>c</sup>Uppercase indicates target codon and target bases are underlined.



**Table S4.** Independent Mutations in the Liver *cII* Gene of Big Blue® Transgenic Mice Treated with Vehicle, DEB, BSO/DEB, or *O*<sup>6</sup>-BzGua/DEB

| position <sup>a</sup> | mutation <sup>b</sup> | amino acid change | sequence context<br>5' → 3' <sup>c</sup> | number of independent mutations |     |         |                                  |
|-----------------------|-----------------------|-------------------|------------------------------------------|---------------------------------|-----|---------|----------------------------------|
|                       |                       |                   |                                          | vehicle                         | DEB | BSO/DEB | <i>O</i> <sup>6</sup> -BzGua/DEB |
| 1                     | A → G                 | Met → Val         | cat <u>A</u> TGggt                       |                                 | 2   | 1       |                                  |
|                       | A → T                 | Met → Leu         | cat <u>A</u> TGggt                       |                                 | 1   |         |                                  |
| 2                     | T → A                 | Met → Lys         | catA <u>T</u> Gggt                       |                                 |     |         | 1                                |
|                       | T → C                 | Met → Thr         | catA <u>T</u> Gggt                       |                                 |     |         | 1                                |
| 3                     | G → A                 | Met → Ile         | catAT <u>G</u> ggt                       |                                 |     | 1       | 1                                |
|                       | G → T                 | Met → Ile         | catAT <u>G</u> ggt                       |                                 | 1   |         |                                  |
| 15                    | C → A                 | Asn → Lys         | gcaAA <u>C</u> aaa                       | 1                               |     |         |                                  |
| 16                    | A → T                 | Lys → Stop        | aac <u>A</u> AAcgc                       |                                 |     |         | 1                                |
| 19                    | C → T                 | Arg → Cys         | aaa <u>C</u> GCaac                       |                                 | 1   | 1       | 1                                |
| 25                    | G → A                 | Glu → Lys         | aac <u>G</u> AGgct                       | 2                               | 1   | 1       | 2                                |
|                       | G → T                 | Glu → Stop        | aac <u>G</u> AGgct                       | 1                               |     | 1       | 1                                |
| 26                    | A → G                 | Glu → Gly         | aac <u>G</u> AGgct                       |                                 | 1   |         |                                  |
| 31                    | C → A                 | Leu → Ile         | gct <u>C</u> TAcga                       |                                 | 1   |         | 1                                |
| 32                    | T → C                 | Leu → Pro         | gct <u>C</u> TAcga                       |                                 | 1   |         | 1                                |
| 34                    | C → T                 | Arg → Stop        | cta <u>C</u> GAatc                       | 3                               | 2   | 1       | 2                                |
| 35                    | G → A                 | Arg → Glu         | cta <u>C</u> GAatc                       | 1                               |     |         | 1                                |
|                       | G → T                 | Arg → Leu         | cta <u>C</u> GAatc                       |                                 | 1   | 1       | 1                                |
| 40                    | G → A                 | Glu → Lys         | atc <u>G</u> AGagt                       |                                 | 1   |         | 1                                |
| 41                    | A → T                 | Glu → Val         | atc <u>G</u> AGagt                       |                                 |     | 1       |                                  |
|                       | A → G                 | Glu → Gly         | atc <u>G</u> AGagt                       |                                 | 1   | 1       |                                  |
| 50                    | T → C                 | Leu → Ser         | gcg <u>T</u> TGctt                       |                                 | 1   | 1       |                                  |
| 51                    | G → T                 | Leu → Phe         | gcg <u>T</u> TGctt                       |                                 | 1   | 1       |                                  |
| 55                    | A → C                 | Asn → His         | ctt <u>A</u> ACaaa                       |                                 | 2   | 1       | 1                                |
| 58                    | A → G                 | Lys → Glu         | aac <u>A</u> AAatc                       |                                 | 1   | 1       |                                  |
| 64                    | G → A                 | Ala → Thr         | atc <u>G</u> CAatg                       |                                 |     | 1       | 1                                |
| 73-74                 | GG → CT               | Glu → Ile         | ctt <u>G</u> GAact                       |                                 |     | 1       |                                  |
| 74                    | G → T                 | Gly → Val         | ctt <u>G</u> GAact                       | 1                               |     | 1       |                                  |
| 82                    | A → G                 | Lys → Glu         | gag <u>A</u> AGaca                       |                                 | 1   |         | 1                                |
| 89                    | C → A                 | Ala → Glu         | aca <u>G</u> CGgaa                       |                                 | 1   |         | 1                                |
|                       | C → T                 | Ala → Val         | aca <u>G</u> CGgaa                       | 1                               |     | 1       | 1                                |
| 100                   | G → T                 | Gly → Cys         | gtg <u>G</u> GCggt                       |                                 | 1   | 1       |                                  |
| 101                   | G → T                 | Gly → Val         | gtg <u>G</u> GCggt                       |                                 |     | 1       |                                  |
| 103                   | G → A                 | Val → Ile         | ggc <u>G</u> TTgat                       | 3                               |     | 2       | 1                                |
|                       | G → C                 | Val → Leu         | ggc <u>G</u> TTgat                       | 1                               |     | 1       |                                  |
|                       | G → T                 | Val → Phe         | ggc <u>G</u> TTgat                       | 1                               |     |         | 1                                |
| 108                   | T → C                 | Asp → Asp         | gat <u>G</u> ATaag                       |                                 |     |         | 1                                |
| 109                   | A → G                 | Lys → Glu         | gat <u>A</u> AGtcg                       |                                 |     |         | 1                                |
| 113                   | C → T                 | Ser → Leu         | aag <u>T</u> CGcag                       | 1                               | 1   | 1       | 1                                |
| 115                   | C → T                 | Gln → Stop        | tcg <u>C</u> AGatc                       |                                 | 1   | 1       | 1                                |
| 118                   | A → T                 | Ile → Phe         | cag <u>A</u> TCagc                       | 1                               |     |         |                                  |
| 124                   | A → G                 | Arg → Gly         | agc <u>A</u> GGtgg                       |                                 | 1   |         | 1                                |
| 125                   | G → T                 | Arg → Met         | agc <u>A</u> GGtgg                       |                                 |     |         | 1                                |
| 141                   | G → A                 | Trp → Stop        | gac <u>T</u> GGatt                       |                                 | 1   | 1       |                                  |

|         |         |            |                                                           |    |    |    |    |
|---------|---------|------------|-----------------------------------------------------------|----|----|----|----|
|         | G → T   | Trp → Cys  | gacT <u>G</u> Gatt                                        | 1  |    | 1  |    |
| 145     | C → A   | Pro → Thr  | att <u>C</u> CAaag                                        |    |    |    | 1  |
| 154-155 | TC → AG | Ser → Arg  | ttc <u>T</u> CAatg                                        |    | 1  |    |    |
| 160     | C → G   | Leu → Val  | atg <u>C</u> TGctt                                        |    |    |    | 1  |
| 175     | G → C   | Glu → Gln  | ctt <u>G</u> AAtgg                                        |    |    |    | 1  |
|         | G → T   | Glu → Stop | ctt <u>G</u> AAtgg                                        |    |    |    | 1  |
| 178/185 | +G      | Frameshift | t <u>G</u> <u>G</u> <u>G</u> <u>G</u> <u>G</u> <u>G</u> t | 3  | 2  | 2  | 2  |
| 179     | G → A   | Trp → Stop | gaaT <u>G</u> Gggg                                        |    | 1  | 1  | 1  |
| 179-184 | -G      | Frameshift | t <u>G</u> <u>G</u> <u>G</u> <u>G</u> <u>G</u> <u>G</u> t | 1  | 3  |    | 1  |
| 185     | T → G   | Val → Gly  | gggT <u>C</u> Gtt                                         | 1  |    |    |    |
| 190     | G → C   | Asp → Gln  | gtt <u>G</u> ACgac                                        | 1  | 1  |    |    |
| 196     | G → A   | Asp → Asn  | gac <u>G</u> ACatg                                        | 4  | 1  | 2  | 1  |
|         | G → T   | Asp → Tyr  | gac <u>G</u> ACatg                                        |    |    | 1  |    |
| 200     | T → C   | Met → Thr  | gacA <u>T</u> Ggct                                        |    | 1  |    |    |
| 206     | G → A   | Arg → Gln  | gct <u>C</u> GAttg                                        | 2  | 1  | 2  | 1  |
| 211     | G → C   | Ala → Pro  | ttg <u>G</u> CGcga                                        | 1  |    |    |    |
| 212     | C → A   | Ala → Glu  | ttg <u>G</u> CGcga                                        |    | 2  |    |    |
|         | C → T   | Ala → Val  | ttg <u>G</u> CGcga                                        | 2  |    | 1  | 1  |
| 214     | C → T   | Arg → Stop | gcg <u>C</u> GAcaa                                        | 2  | 1  | 2  | 1  |
| 215     | G → T   | Arg → Leu  | gcg <u>C</u> GAcaa                                        |    |    | 1  |    |
| 220     | G → T   | Val → Phe  | caa <u>G</u> TTgct                                        | 1  |    |    |    |
| 274     | C → A   | Gln → Lys  | gaa <u>C</u> AAatc                                        |    |    | 1  |    |
| 287     | A → T   | Glu → Val  | atg <u>G</u> AGttc                                        | 1  |    |    |    |
| Total   |         |            |                                                           | 37 | 40 | 39 | 40 |

<sup>a</sup>Position 1 is the first base of the start codon in the *cII* coding sequence.

<sup>b</sup>Presented in term of sequence change on nontranscribed DNA strand.

<sup>c</sup>Uppercase indicates target codon and target bases are underlined.
